# Supplementary material for: Chasing SARS-CoV-2 XBB.1.16 Recombinant Lineage in India and the Clinical Profile of XBB.1.16 cases in Maharashtra, India
Source: bioRxiv or medRxiv preprint supplement (doi:10.1101/2023.04.22.23288965), 2023-04-26
Supplement: Supplementary file [file media-1.pdf]

## SUPPLEMENTAL TABLE

### **Data Availability**

GISAID Identifier: EPI\_SET\_230419bg

doi: [10.55876/gis8.230419bg](https://doi.org/10.55876/gis8.230419bg)

All genome sequences and associated metadata in this dataset are published in GISAID's EpiCoV database. To view the contributors of each individual sequence with details such as accession number, Virus name, Collection date, Originating Lab and Submitting Lab and the list of Authors, visit [10.55876/gis8.230419bg](https://gisaid.org/gis8.230419bg)

### **Data Snapshot**

- EPI\_SET\_230419bg is composed of 2,944 individual genome sequences.
- The collection dates range from 2022-12-01 to 2023-04-03;
- Data were collected in 1 countries and territories;
- All sequences in this dataset are compared relative to hCoV-19/Wuhan/WIV04/2019 (WIV04), the official reference sequence employed by GISAID (EPI\_ISL\_402124). Learn more at <https://gisaid.org/WIV04>.
